# Supplementary material
Source: publisher site journal article supplement (https://www.dovepress.com/article/328653)

## Online Supplement

**Table E1: Pre-biologic 1 demographics and clinical characteristic variables collected.**

| <b>Variable</b>                                           | <b>Categories</b>                                                                                                                         |
|-----------------------------------------------------------|-------------------------------------------------------------------------------------------------------------------------------------------|
| <b>Age (years)</b>                                        | 18-34<br>35-54<br>55-79<br>≥80                                                                                                            |
| <b>Sex</b>                                                | Female<br>Male                                                                                                                            |
| <b>Ethnicity</b>                                          | African<br>Asian<br>Caucasian<br>Mixed/Other/Unknown                                                                                      |
| <b>Age of asthma onset (years)</b>                        | <12<br>12-29<br>≥30                                                                                                                       |
| <b>Smoking status</b>                                     | Never smoker<br>Ex-smoker<br>Current smoker                                                                                               |
| <b>Body-mass-index(kg/m<sup>2</sup>)</b>                  | Underweight<br>Normal weight<br>Overweight<br>Obese                                                                                       |
| <b>Long-term oral corticosteroids (OCS)</b>               | Prevalent use                                                                                                                             |
| <b>Invasive Ventilation</b>                               | ≥1                                                                                                                                        |
| <b>Emergency visits</b>                                   | ≥1                                                                                                                                        |
| <b>Hospitalisations</b>                                   | ≥1                                                                                                                                        |
| <b>Exacerbations</b>                                      | Median exacerbation rate among those on long-term oral corticosteroids (OCS)<br>Median exacerbation rate among those not on long-term OCS |
| <b>Immunoglobulin E (IgE) (IU/mL)</b>                     | <150<br>≥150 - <400<br>≥400                                                                                                               |
| <b>Blood Eosinophil Counts (BEC) (cells/μL)</b>           | <300<br>≥300                                                                                                                              |
| <b>Fractionally exhaled nitric oxide (FeNO) (ppb)</b>     | <25<br>≥25 - <50<br>≥50                                                                                                                   |
| <b>Add-on therapy</b>                                     | Long-acting muscarinic antagonist (LAMA)<br>Leukotriene receptor antagonist (LTRA)<br>Theophylline                                        |
| <b>Allergic rhinitis</b>                                  | Ever                                                                                                                                      |
| <b>Eczema</b>                                             | Ever                                                                                                                                      |
| <b>Chronic rhinosinusitis (CRS) and nasal polyps (NP)</b> | CRSwNP (with NP)<br>eCRS (eosinophilic)<br>CRSsNP (without out NP)                                                                        |

**Table E2: Biologics available in each country (n=11) as of May 2019.**

| <b>Number of Biologics</b> | <b>Biologic</b>                                              | <b>Country</b>   |
|----------------------------|--------------------------------------------------------------|------------------|
| <b>5</b>                   | Omalizumab, Mepolizumab, Reslizumab, Benralizumab, Dupilumab | USA, DK, IT, CAN |
| <b>4</b>                   | Omalizumab, Mepolizumab, Benralizumab, Dupilumab             | JP, KW           |
| <b>4</b>                   | Omalizumab, Mepolizumab, Reslizumab, Benralizumab            | UK, ES           |
| <b>3</b>                   | Omalizumab, Mepolizumab, Benralizumab,                       | BG               |
| <b>3</b>                   | Omalizumab, Mepolizumab, Reslizumab                          | SK               |
| <b>2</b>                   | Omalizumab, Mepolizumab                                      | GR               |

Figure E1: Subject disposition and pattern of biologic use (eCRF population – n=2656).

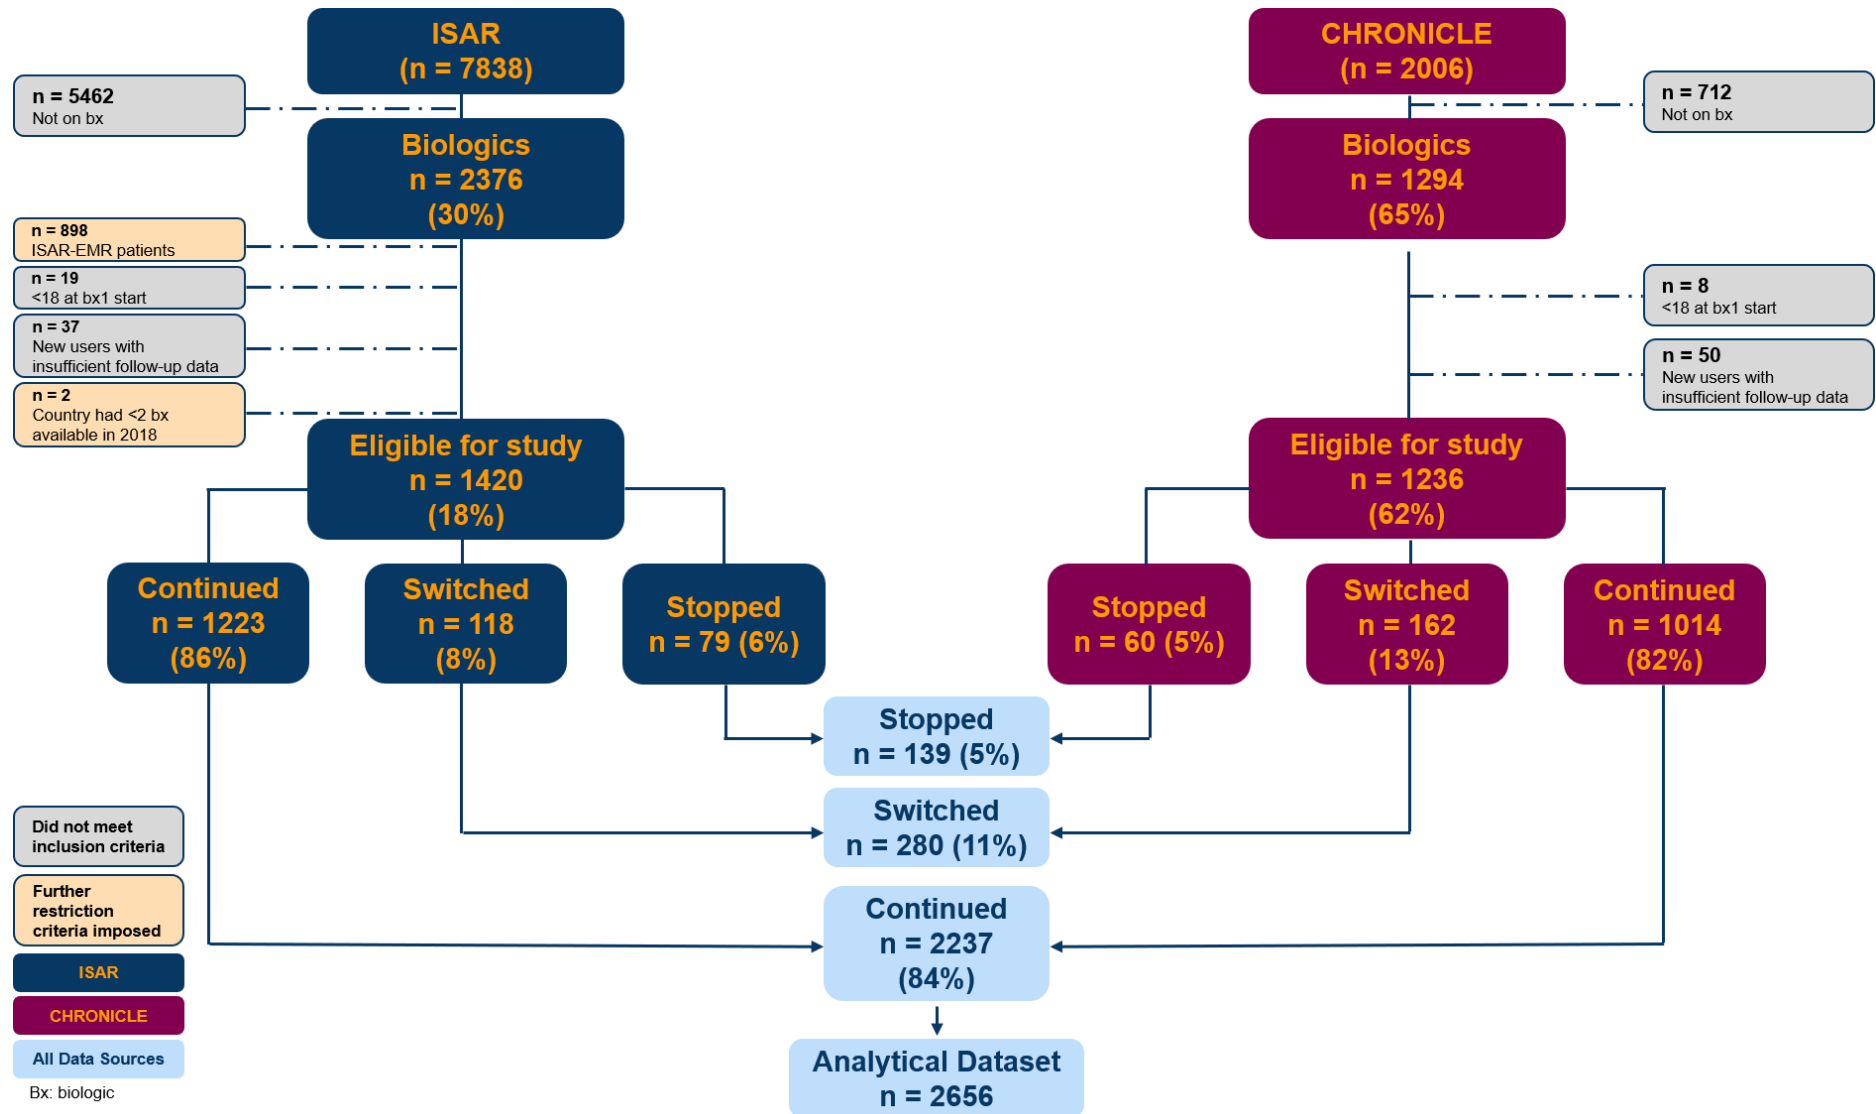

Figure E2: Subject disposition and pattern of biologic use in non-USA (n=1404) and USA (n=2127) populations.

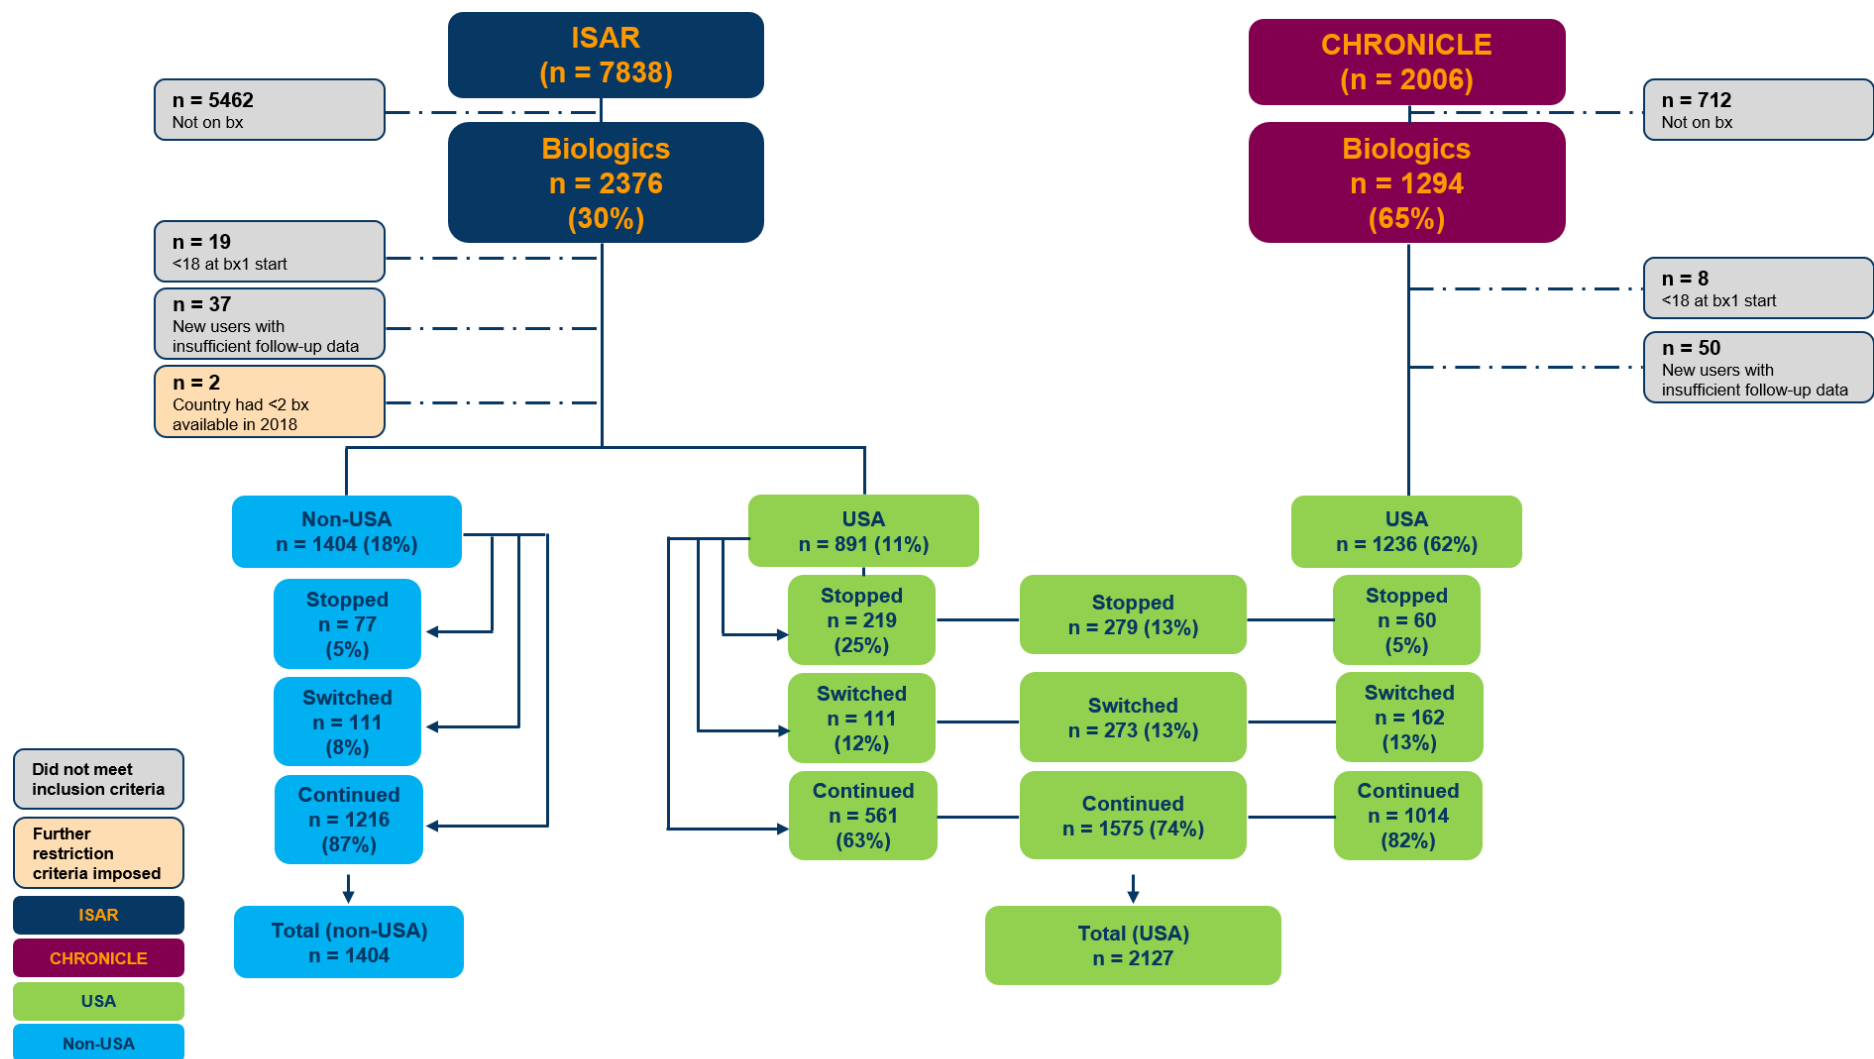

Figure E3: Biologic availability from 2015 to 2019 in 11 countries included in the analysis.

### Increases in biologic availability across countries (n=11) over time

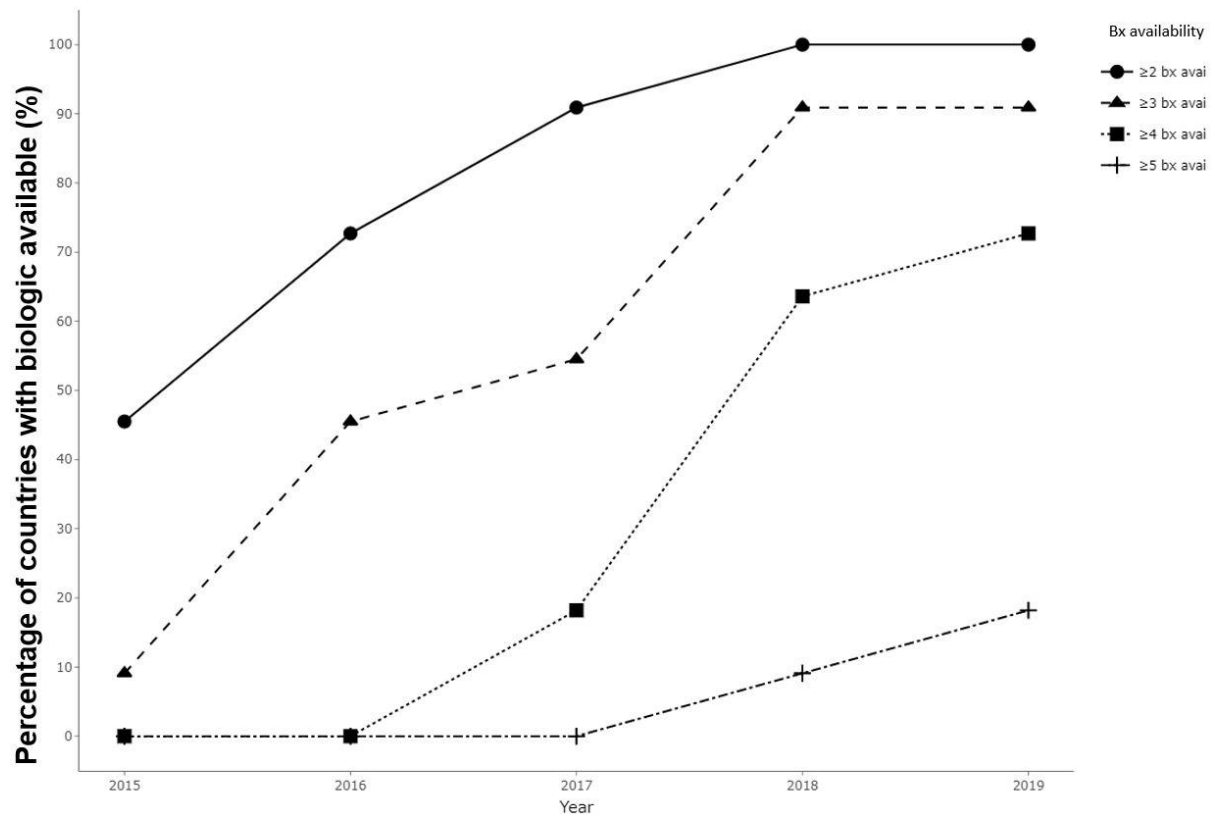

Figure E4: Proportion of patients who used each biologic class during 2015-2019.

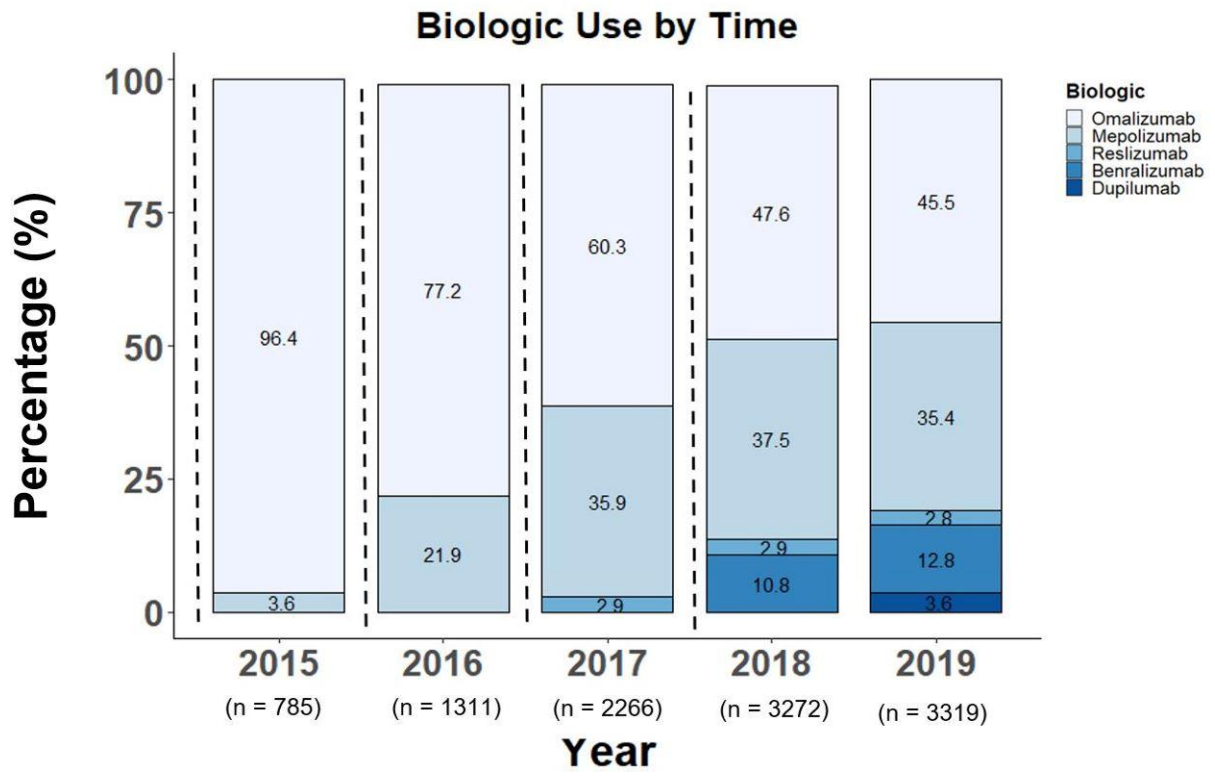

**Figure E5: Proportion of patients who started on each class of biologic from 2015 to 2019.**

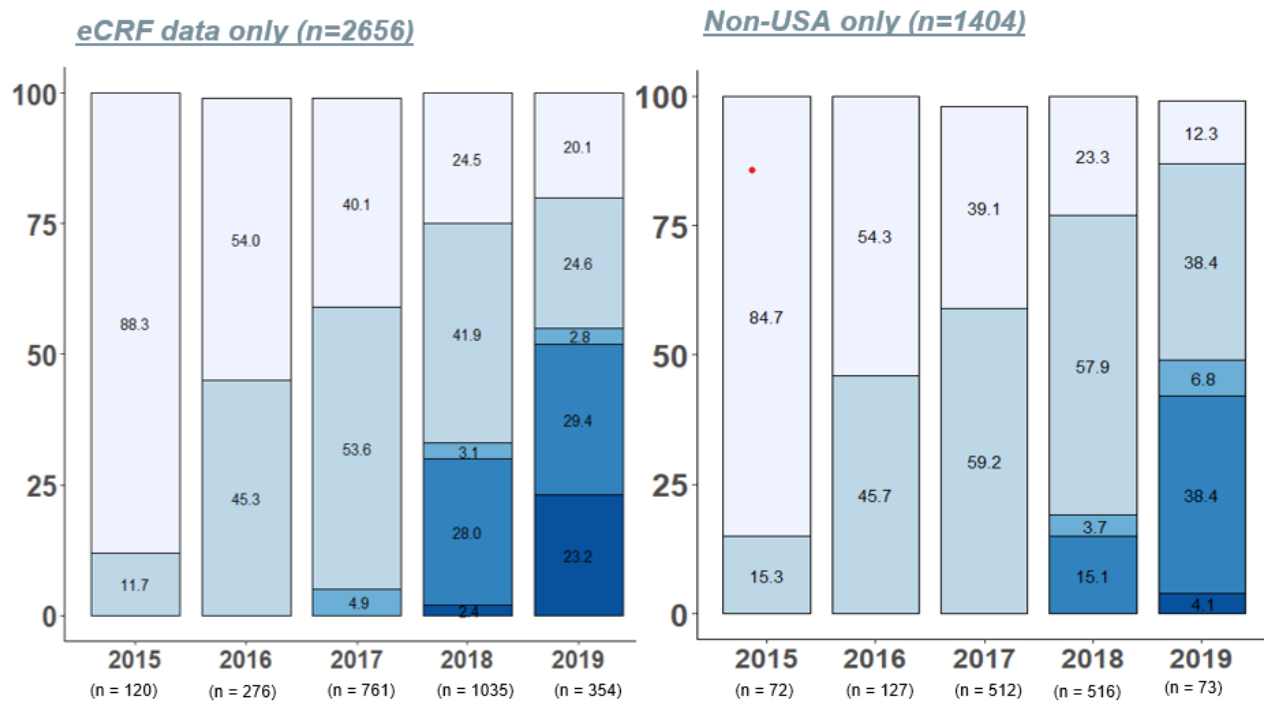

**Biologic**

- Omalizumab
- Mepolizumab
- Reslizumab
- Benralizumab
- Dupilumab

**Figure E6: Pattern of biologic switch for first switch.**

**eCRF data only (n=273)**

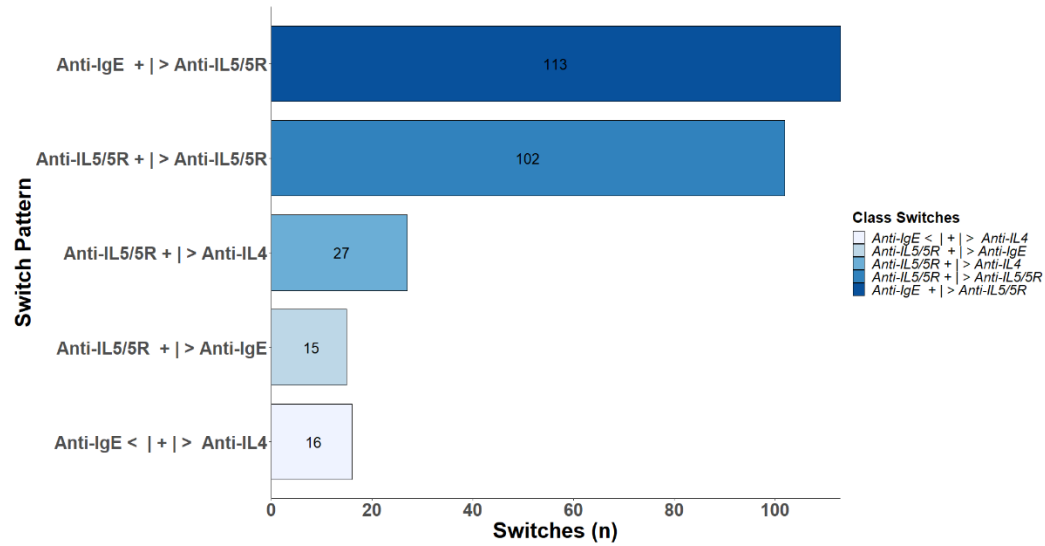

**Non-USA data only (n=104)**

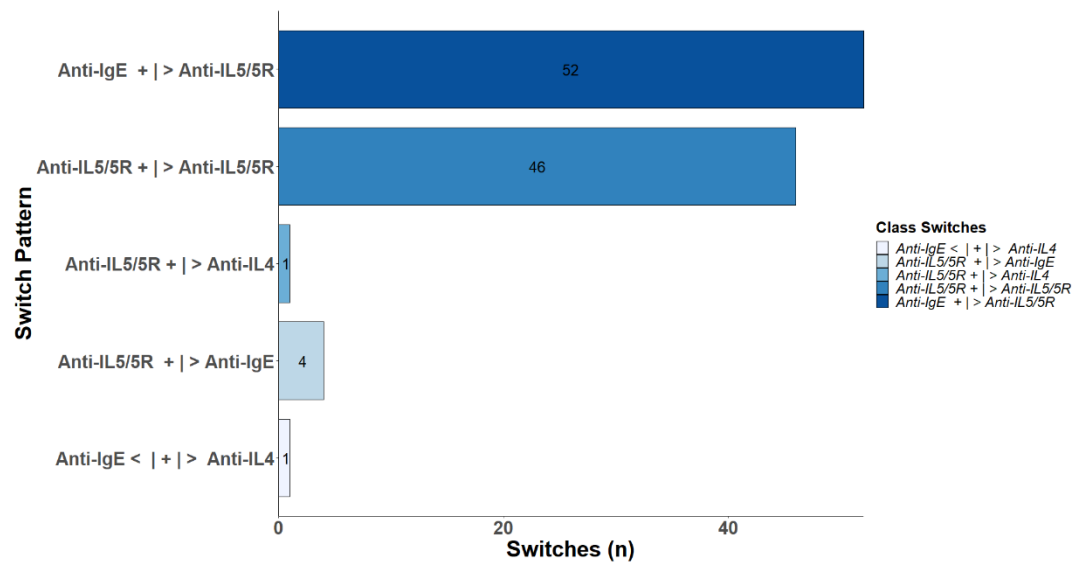



**Figure E7: Pattern of biologic switch for first switch stratified by age, long-term OCS use, age of asthma onset and presence of nasal polyps.**

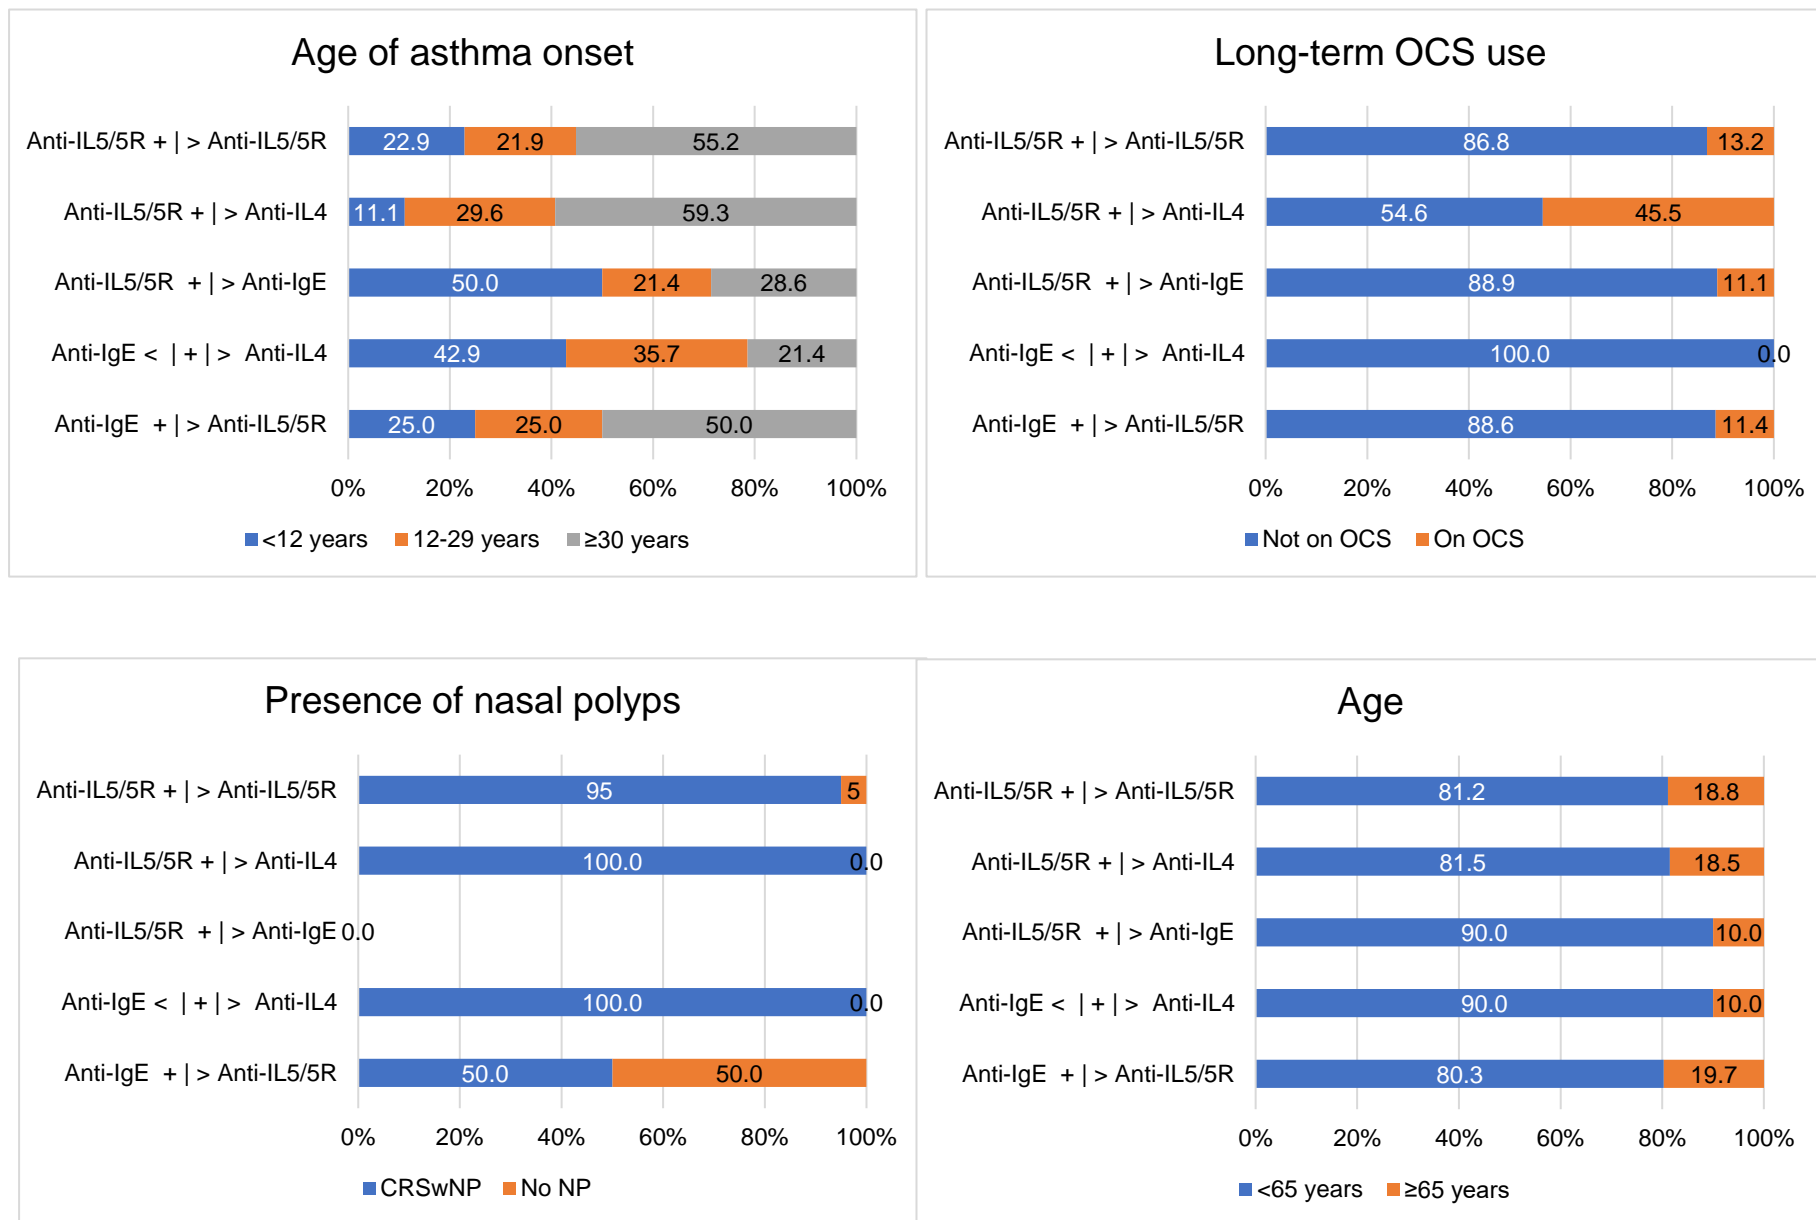

## Legend

| <i>Subgroup</i>            | <b>Anti-IgE +   &gt; Anti-IL5/5R</b> | <b>Anti-IgE &lt;   +   &gt; Anti-IL4R</b> | <b>Anti-IL5/5R +   &gt; Anti-IgE</b> | <b>Anti-IL5/5R +   &gt; Anti-IL4R</b> | <b>Anti-IL5/5R +   &gt; Anti-IL5/5R</b> |
|----------------------------|--------------------------------------|-------------------------------------------|--------------------------------------|---------------------------------------|-----------------------------------------|
| <i>Long-term OCS</i>       | (n=140)                              | (n=8)                                     | (n=18)                               | (n=11)                                | (n=76)                                  |
| <i>Age (USA)</i>           | (n=132)                              | (n=20)                                    | (n=20)                               | (n=27)                                | (n=69)                                  |
| <i>Nasal polyps</i>        | (n=70)                               | (n=3)                                     | (n=0)                                | (n=5)                                 | (n=20)                                  |
| <i>Age of asthma onset</i> | (n=104)                              | (n=14)                                    | (n=14)                               | (n=27)                                | (n=96)                                  |

**Figure E8: Pattern of biologic switch for patients with severe asthma enrolled into ISAR or CHRONICLE those who switched more than once (n=45).** IgE: immunoglobulin E; ISAR: International Severe Asthma Registry; IL: interleukin. Patterns are mutually exclusive; | : or , < , > : sequence of switch; +: add-on use

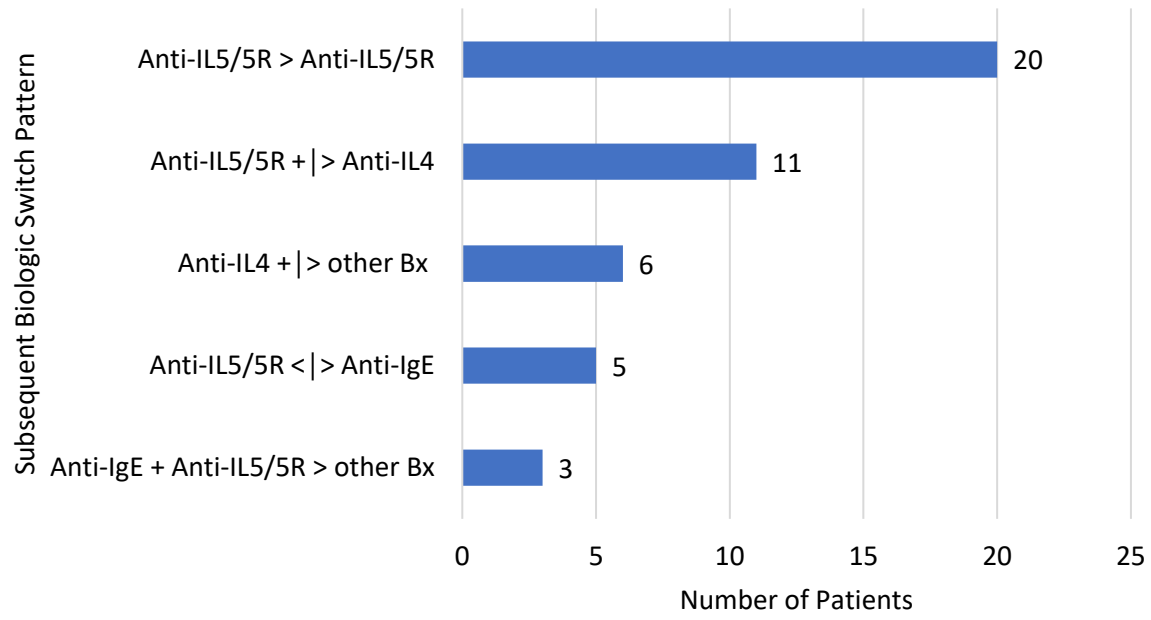

Supplement: Supplementary file 1 [file get_supplementary_file.php]
